# Supplementary material for: Designed biosynthesis of 25-methyl and 25-ethyl ivermectin with enhanced insecticidal activity by domain swap of avermectin polyketide synthase
Source: PubMed Central journal article supplement (PMC4581413; doi:10.1186/s12934-015-0337-y), 2015-09-24

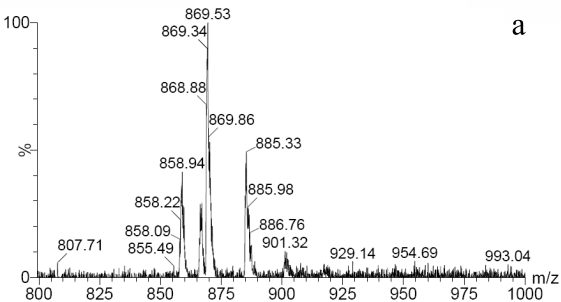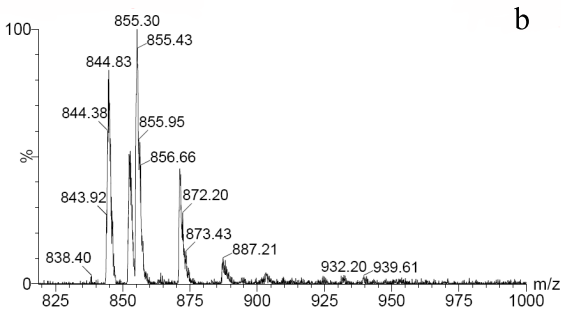

Supplement: 12934_2015_337_MOESM3_ESM.pdf [file 12934_2015_337_MOESM3_ESM.pdf]
